# Supplementary material for: Donor lymphocyte infusions after first allogeneic hematopoietic stem-cell transplantation in adults with acute myeloid leukemia: a single-center landmark analysis
Source: PubMed Central journal article supplement (PMC8357755; doi:10.1007/s00277-021-04494-z), 2021-04-01
Supplement: 277_2021_4494_MOESM1_ESM.pdf [file 277_2021_4494_MOESM1_ESM.pdf]

## Donor lymphocyte infusions after first allogeneic hematopoietic stem-cell transplantation in adults with acute myeloid leukemia: a single-center landmark analysis

### Annals of Hematology

Andrés R. Rettig<sup>1</sup>, Gabriele Ihorst<sup>2</sup>, Hartmut Bertz<sup>1</sup>, Michael Lübbert<sup>1</sup>, Reinhard Marks<sup>1</sup>, Miguel Waterhouse<sup>1</sup>, Ralph Wäsch<sup>1</sup>, Robert Zeiser<sup>1</sup>, Justus Duyster<sup>1</sup>, Jürgen Finke<sup>1</sup>

<sup>1</sup>Department of Hematology, Oncology and Stem Cell Transplantation, University Medical Center Freiburg, Freiburg, Germany

<sup>2</sup>Clinical Trials Unit, University Medical Center Freiburg, Freiburg, Germany

Corresponding author: Andrés R. Rettig; e-mail: andres.rettig@uniklinik-freiburg.de

### Online Resource 1

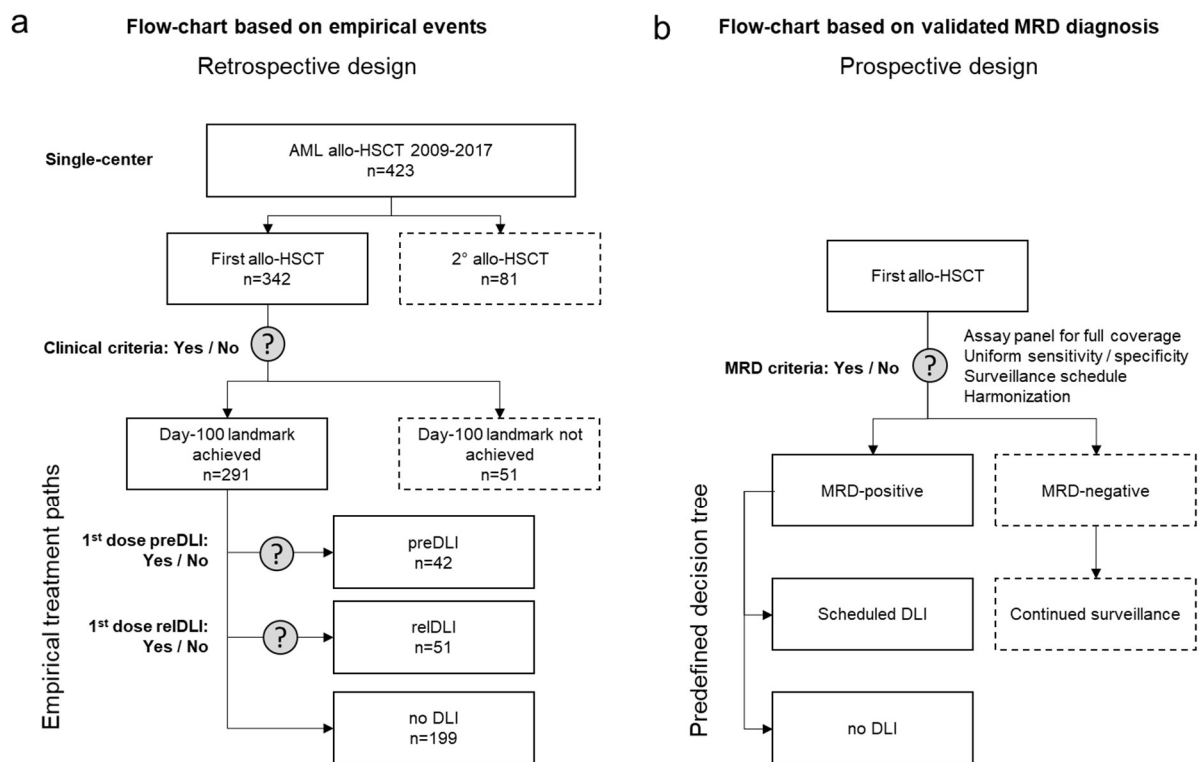

Schematic representation of (a) cohort partitioning algorithm used in the present study, with achievement of day 100 landmark criteria (Yes / No) and documented date of first-dose DLI treatment, either before (preDLI, Yes / No) or after date of first detection of hematological relapse (relDLI, Yes / No) as mutually exclusive principal events. Part (b) depicts a hypothetical future scenario in AML with allo-HSCT, in which a standardized, sensitive and specific clinical entity of Measurable Residual Disease (MRD) becomes available as an approach to principal cohort stratification (cf. Ravandi et al., Blood Adv 2:1356–1366, 2018).

**Online Resource 2** Comparison of outcome results for adult AML patients with first allo-HSCT based on survival-with-transplant vs conventional overall survival including re-transplantation

**a** Survival after first allo-HSCT: endpoint comparison

| Endpoint                                    | Adult AML<br>1° allo-HSCT | Day-100 landmark cohort | Day-100 landmark cohort and DLI |                    |                    |
|---------------------------------------------|---------------------------|-------------------------|---------------------------------|--------------------|--------------------|
|                                             |                           |                         | no DLI                          | preDLI             | reDLI              |
| <b>Survival-with-transplant<sup>a</sup></b> |                           |                         |                                 |                    |                    |
| Median (months)                             | 29.5                      | 55.7                    | Not reached                     | 40.9               | 10.4               |
| 2-year (95% CI)                             | 53.1% (47.7-58.2)         | 61.9% (56.1-67.2)       | 70.8 % (63.9-76.6)              | 64.3% (47.9-76.7)  | 25.5% (14.6-37.9)  |
| 5-year (95% CI)                             | 42.5% (36.9-47.9)         | 49.4% (43.2-55.3)       | 62.4 % (54.9-69.0)              | 43.3% (27.7-57.9)  | 9.8% (3.6-19.7)    |
| <b>Overall survival<sup>b</sup></b>         |                           |                         |                                 |                    |                    |
| Median (months)                             | 36.9                      | 65.8                    | Not reached                     | 56.0               | 16.2               |
| 2-year (95% CI)                             | 57.5% (52.1-62.6)         | 65.7 % (59.9-70.8)      | 72.5 % (65.5-78.0)              | 71.3 % (55.0-82.6) | 35.3 % (22.6-48.2) |
| 5-year (95% CI)                             | 44.7% (39.0-50.2)         | 51 % (57.3-46.1)        | 63.5 % (56.0-70.1)              | 46.6 % (30.6-61.6) | 11.8 % (4.5-22.8)  |

<sup>a</sup> Survival with transplant defined by date of first transplantation to the earlier of death, from any cause, or re-transplantation, censored for status alive at last follow-up. <sup>b</sup> Overall survival defined by date of first transplantation to death, from any cause, censored for status alive at last follow-up.

**b** Day-100 landmark cohort  
Survival after first allo-HSCT by disease status at transplantation: endpoint comparison

| Status at first allo-HSCT                   | Median (months) | 2-year (95% CI)   | 5-year (95% CI)   | P-value | HR Active disease vs CR | 95% CI of ratio |
|---------------------------------------------|-----------------|-------------------|-------------------|---------|-------------------------|-----------------|
| <b>Survival-with-transplant<sup>a</sup></b> |                 |                   |                   |         |                         |                 |
| CR <sup>c</sup>                             | Not reached     | 69.2% (60.6-76.2) | 59.3% (50.1-67.4) | 0.0017  | 1.68                    | (1.22-2.31)     |
| Active disease                              | 32.7            | 55.7% (47.6-63.0) | 40.5% (32.1-48.8) |         |                         |                 |
| <b>Overall survival<sup>b</sup></b>         |                 |                   |                   |         |                         |                 |
| CR                                          | Not reached     | 74.5% (66.2-81.1) | 62.2% (53-70.1)   | 0.0002  | 1.89                    | (1.36-2.62)     |
| Active disease                              | 36.8            | 58.8% (50.7-66.0) | 41% (32.4-49.4)   |         |                         |                 |

<sup>a</sup> Survival with transplant defined by date of first transplantation to the earlier of death, from any cause, or re-transplantation, censored for status alive at last follow-up. <sup>b</sup> Overall survival defined by date of first transplantation to death, from any cause, censored for status alive at last follow-up. <sup>c</sup> Disease status at transplantation: CR, complete remission vs. active disease

**Online Resource 3** Covariate analysis for adult AML patients with first allo-HSCT based on disease status at transplantation

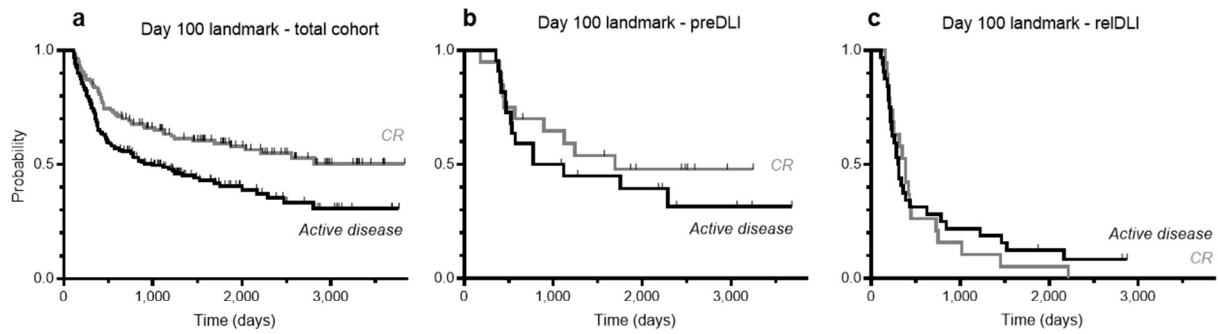

| Cohort                   | Status at HSCT       | Median survival (months) | HR   | 95% CI of ratio | P-value |
|--------------------------|----------------------|--------------------------|------|-----------------|---------|
| Day-100 landmark - total | Active disease vs CR | 32.7 vs not reached      | 1.68 | 1.22-2.31       | 0.0017  |
| Landmark with preDLI     | Active disease vs CR | 31.2 vs 55.7             | 1.41 | 0.63-3.14       | 0.40    |
| Landmark with reDLI      | Active disease vs CR | 12.6 vs 9.9              | 0.89 | 0.49-1.59       | 0.68    |

Comparison of survival with first transplant in patients who were either in CR or had active disease at the time of transplantation. The top panels show Kaplan-Meier plots for all patients meeting the day 100 landmark (a) and subgroups meeting the day 100 landmark and receiving either preDLI (b) or reDLI (c). Survival times are shown from day of transplantation. Vertical tick marks along the survival curves indicate individual patients alive without re-transplantation at the respective time of last follow-up. The bottom panel summarizes the results of univariate comparisons for survival and pre-transplantation clinical status.
